# Supplementary material
Source: PubMed Central journal article supplement (PMC2562952)
Supplement: NIHMS44300-supplement-Table_S1.pdf [file NIHMS44300-supplement-Table_S1.pdf]

**Table S1 Primer Sequences Used****A. Primer sequences for genomic PCR and sequencing for POLH**

|         | Forward primer                                  | reverse primer                                  |
|---------|-------------------------------------------------|-------------------------------------------------|
| Exon 2  | G6453F<br><b>GTTCCATGCTCCCATGCTC</b> (20mer)    | G6792R<br><b>ACCACCACCACCACAACAAC</b> (20mer)   |
| Exon 3  | G7005F<br><b>CCAAGCAGGCTTGAAGCTC</b> (19mer)    | G7466R<br><b>AACACCAGTTCCTAGCCTC</b> (19mer)    |
| Exon 4  | G11452F<br><b>TGGGAGTGGAGCAGACAATC</b> (20mer)  | G11795R<br><b>AGCAAAGCAGGTTCCAAAG</b> (19mer)   |
| Exon 5  | G21818F<br><b>GCTGGCTGCCATTTTTTGTG</b> (21mer)  | G22272R<br><b>AGGCTGCTCTTCAACTCCTG</b> (20mer)  |
| Exon 6  | G25186F<br><b>CCAAC TTGATGGGTTGACAG</b> (21mer) | G25450R<br><b>ATGTATTTCCCTGGCTCC</b> (19mer)    |
| Exon 7  | G28025F<br><b>TGCTCTCATTGTCTGAACC</b> (21mer)   | G28429R<br><b>ATGGGCCATAGTACCCAAG</b> (20mer)   |
| Exon 8  | G28695F<br><b>ATTCAGTGAGAAGGGCAGG</b> (19mer)   | G29062R<br><b>CTTCCACAGCTACCAAACC</b> (20mer)   |
| Exon 9  | G29285F<br><b>GTCACTGATGGGAAACAAG</b> (20mer)   | G29649R<br><b>GTTCTGCTCCATAAGGTAAG</b> (22mer)  |
| Exon 10 | G34690F<br><b>TGTTCCAAACCATTGTCAAC</b> (21mer)  | G35043R<br><b>TCTTGAGAGCTAAGACAGAGC</b> (22mer) |
| Exon 11 | G37765F<br><b>CTGTGGCAGAACCAGAATG</b> (19mer)   | AS24<br><b>ATCCTACAGGCAAGCCTGAG</b> (20mer)     |

**B. Primer sequences for genomic PCR and sequencing for POL I**

|          | Forward primer                                    | reverse primer                                    |
|----------|---------------------------------------------------|---------------------------------------------------|
| Exon 1   | G36F<br><b>ACGACGACGAGGAAGACG</b> (18mer)         | G490R<br><b>TCCGGGTCACCTTCTGCC</b> (20mer)        |
| Exon 2   | G1688F<br><b>GGAGAAAACACGCTCACTCTGC</b> (21mer)   | G2078R<br><b>GTGAAGCAAAAATGACCAGCTA</b> (22mer)   |
| Exon 3   | G4241F<br><b>TTGAGACAGGGCTTTTGATTC</b> (21mer)    | G4602R<br><b>TTCATGTAATGAACAGGCATCC</b> (22mer)   |
| Exon 4   | G7991F<br><b>CGTCAATTAAGTGGGCTTT</b> (21mer)      | G8384R<br><b>CAGAATCACACAGCGAACTCA</b> (21mer)    |
| Exon 5   | G10980F<br><b>AGGTGATGATGGTGGTGT</b> (20mer)      | G11480R<br><b>CACACACACACATGCACA</b> (20mer)      |
| Exon 6   | G13116F<br><b>TTCAAGCATCCACTGAAGGT</b> (20mer)    | G13590R<br><b>GCCTTCTAATAGGAAAGGGATCA</b> (23mer) |
| Exon 7   | G14241F<br><b>GGCTCAAAC TAAGGACAAGAGG</b> (22mer) | G14609R<br><b>AAAGCAGAGAAATCCCATGA</b> (20mer)    |
| Exon 8   | G17498F<br><b>GAGTGAGGCCTGAGAGCTTG</b> (20mer)    | G17966R<br><b>TGCTAATCCCTGTGAAGACC</b> (21mer)    |
| Exon 9   | G22166F<br><b>AATGTCAAGATGCCAGTGA</b> (20mer)     | G22662R<br><b>GCATATTTAAGCCAGAAACCA</b> (22mer)   |
| Exon 10A | G24028F<br><b>ACAGCAGCAGCAGGATATT</b> (20mer)     | G24619R<br><b>TCCTTGAGTTCTTTAGGTCCTT</b> (23mer)  |
| Exon 10B | G24351F<br><b>GGAAGGAAGTGTGAGTTGTCC</b> (22mer)   | G24947R<br><b>TCCCTTGCTTTTCAGACCTT</b> (20mer)    |

**C. Primer sequences for POLH real-time QRT-PCR**

|                       | Forward primer (primer position)              | Reverse primer (primer position)                  |
|-----------------------|-----------------------------------------------|---------------------------------------------------|
| WT (exon 2 inclusion) | VMM23 (exon1-2)<br><b>CAGGTGTTGTTACCTTGAA</b> | VMM30 (exon2)<br><b>GCTGCTCCACTTGAACAA</b>        |
| WT (exon 2 inclusion) | VMM33 (exon2)<br><b>CTCTCGTGGACATGGACTG</b>   | VMM26 (exon3-2)<br><b>ACTCACTGCAATTATTCC</b>      |
| Exon 2 skipping       | VMM36 (exon1)<br><b>CCATTTTCTTCCAGTAG</b>     | vmm24 (exon 3-1)<br><b>CATAACTCACTGCAATTATTCA</b> |
