# Supplementary material
Source: PubMed Central journal article supplement (PMC2562952)
Supplement: NIHMS44300-supplement-Table_S2.pdf [file NIHMS44300-supplement-Table_S2.pdf]

| Table S2. Human POLH gene: sequence and information content of normal and mutant splice sites |      |                                                             |          |     |              |                   |              |
|-----------------------------------------------------------------------------------------------|------|-------------------------------------------------------------|----------|-----|--------------|-------------------|--------------|
| 3' Intron (ACCEPTOR)                                                                          | bits |                                                             | exon     |     | bits         | 5' Intron (DONOR) |              |
| 5'UTR                                                                                         |      |                                                             | 1        |     |              |                   | 1            |
|                                                                                               |      |                                                             |          |     | TTACCTTG     | 7.4               | gtaagaaaattt |
| 1                                                                                             |      |                                                             | 2        |     |              |                   | 2            |
| cataaaatggtgttacag                                                                            | 3.4  | AAAAATG                                                     |          |     | GGTGGTGG     | 5.7               | gtatgtagcatt |
| 2                                                                                             |      |                                                             | 3        |     |              |                   | 3            |
| gtgagttctaattcattcag                                                                          | 5.5  | AGGGGAT                                                     |          |     | ACAATAAG     | 7.8               | gtgaaggcta   |
| 3                                                                                             |      |                                                             | 4        |     |              |                   | 4            |
| aatgagccttatactcttag                                                                          | 5.7  | GTACCGG                                                     |          |     | TCAGAAAG     | 5.4               | gtacttccatag |
|                                                                                               |      |                                                             | 4        |     |              |                   |              |
|                                                                                               |      | XP1SE splicing variant-1 (deletion 90 bp exon 4)            |          |     | TCAGAAAT     | 2.1               | gtacttccatag |
|                                                                                               |      |                                                             | GCTACAAG | 6.1 | gtcagcctatct |                   | 4            |
|                                                                                               |      | XP1SE splicing variant-2 (insertion 163 bp intron 4)        |          |     | TCAGAAAT     | 2.1               | 6.5          |
|                                                                                               |      |                                                             |          |     |              |                   | gtatatggctgt |
| 4                                                                                             |      |                                                             | 5        |     |              |                   | 5            |
| ccttttttctaaccttag                                                                            | 11.3 | AATAATT                                                     |          |     | CTCACCAA     | 8.1               | gtaagaaaaaaa |
| 5                                                                                             |      |                                                             | 6        |     |              |                   | 6            |
| tatacttgcagctccag                                                                             | 9.3  | GTCCTGG                                                     |          |     | CGCAAAAT     | 9.3               | gtaagtattcag |
|                                                                                               |      |                                                             | 6        |     |              |                   | 6            |
|                                                                                               |      | XP31BE splicing variant-1 (104 bp deletion - entire exon 6) |          |     | CGCAAAAT     | -0.5              | ctaagtattcag |
|                                                                                               |      | XP31BE splicing variant-2 (42 bp deletion inside exon 6)    |          |     |              |                   |              |
|                                                                                               |      |                                                             | TCACATGG | 3.8 | gtcagtcccaca |                   |              |
| 6                                                                                             |      |                                                             | 7        |     |              |                   | 7            |
| tttgtctccttggatcag                                                                            | 9.6  | CCGTAGT                                                     |          |     | AAGAATGG     | 9.2               | gtaagtattca  |
| 7                                                                                             |      |                                                             | 8        |     |              |                   | 8            |
| tttttgctgggtattag                                                                             | 5.7  | GTCTTGG                                                     |          |     | GGGAACAG     | 10.8              | gtaagctggcat |
| 8                                                                                             |      |                                                             | 9        |     |              |                   | 9            |
| aaagtctcaatacttttag                                                                           | 4.7  | GTACAAT                                                     |          |     | GAAATGAT     | 6.1               | gtaagatttct  |
| 9                                                                                             |      |                                                             | 10       |     |              |                   | 10           |
| tccatccttccaccacag                                                                            | 11.4 | AATGACA                                                     |          |     | ACAGAATG     | 9.5               | gtgagttctttt |
| 10                                                                                            |      |                                                             | 11       |     |              |                   | 3'UTR        |
| ttctttactttctgtatag                                                                           | 12.1 | GTCTCCT                                                     |          |     |              |                   |              |
